# Supplementary material for: A refined model of claudin-15 tight junction paracellular architecture by molecular dynamics simulations
Source: PubMed Central journal article supplement (PMC5581167; doi:10.1371/journal.pone.0184190), 2017-09-01

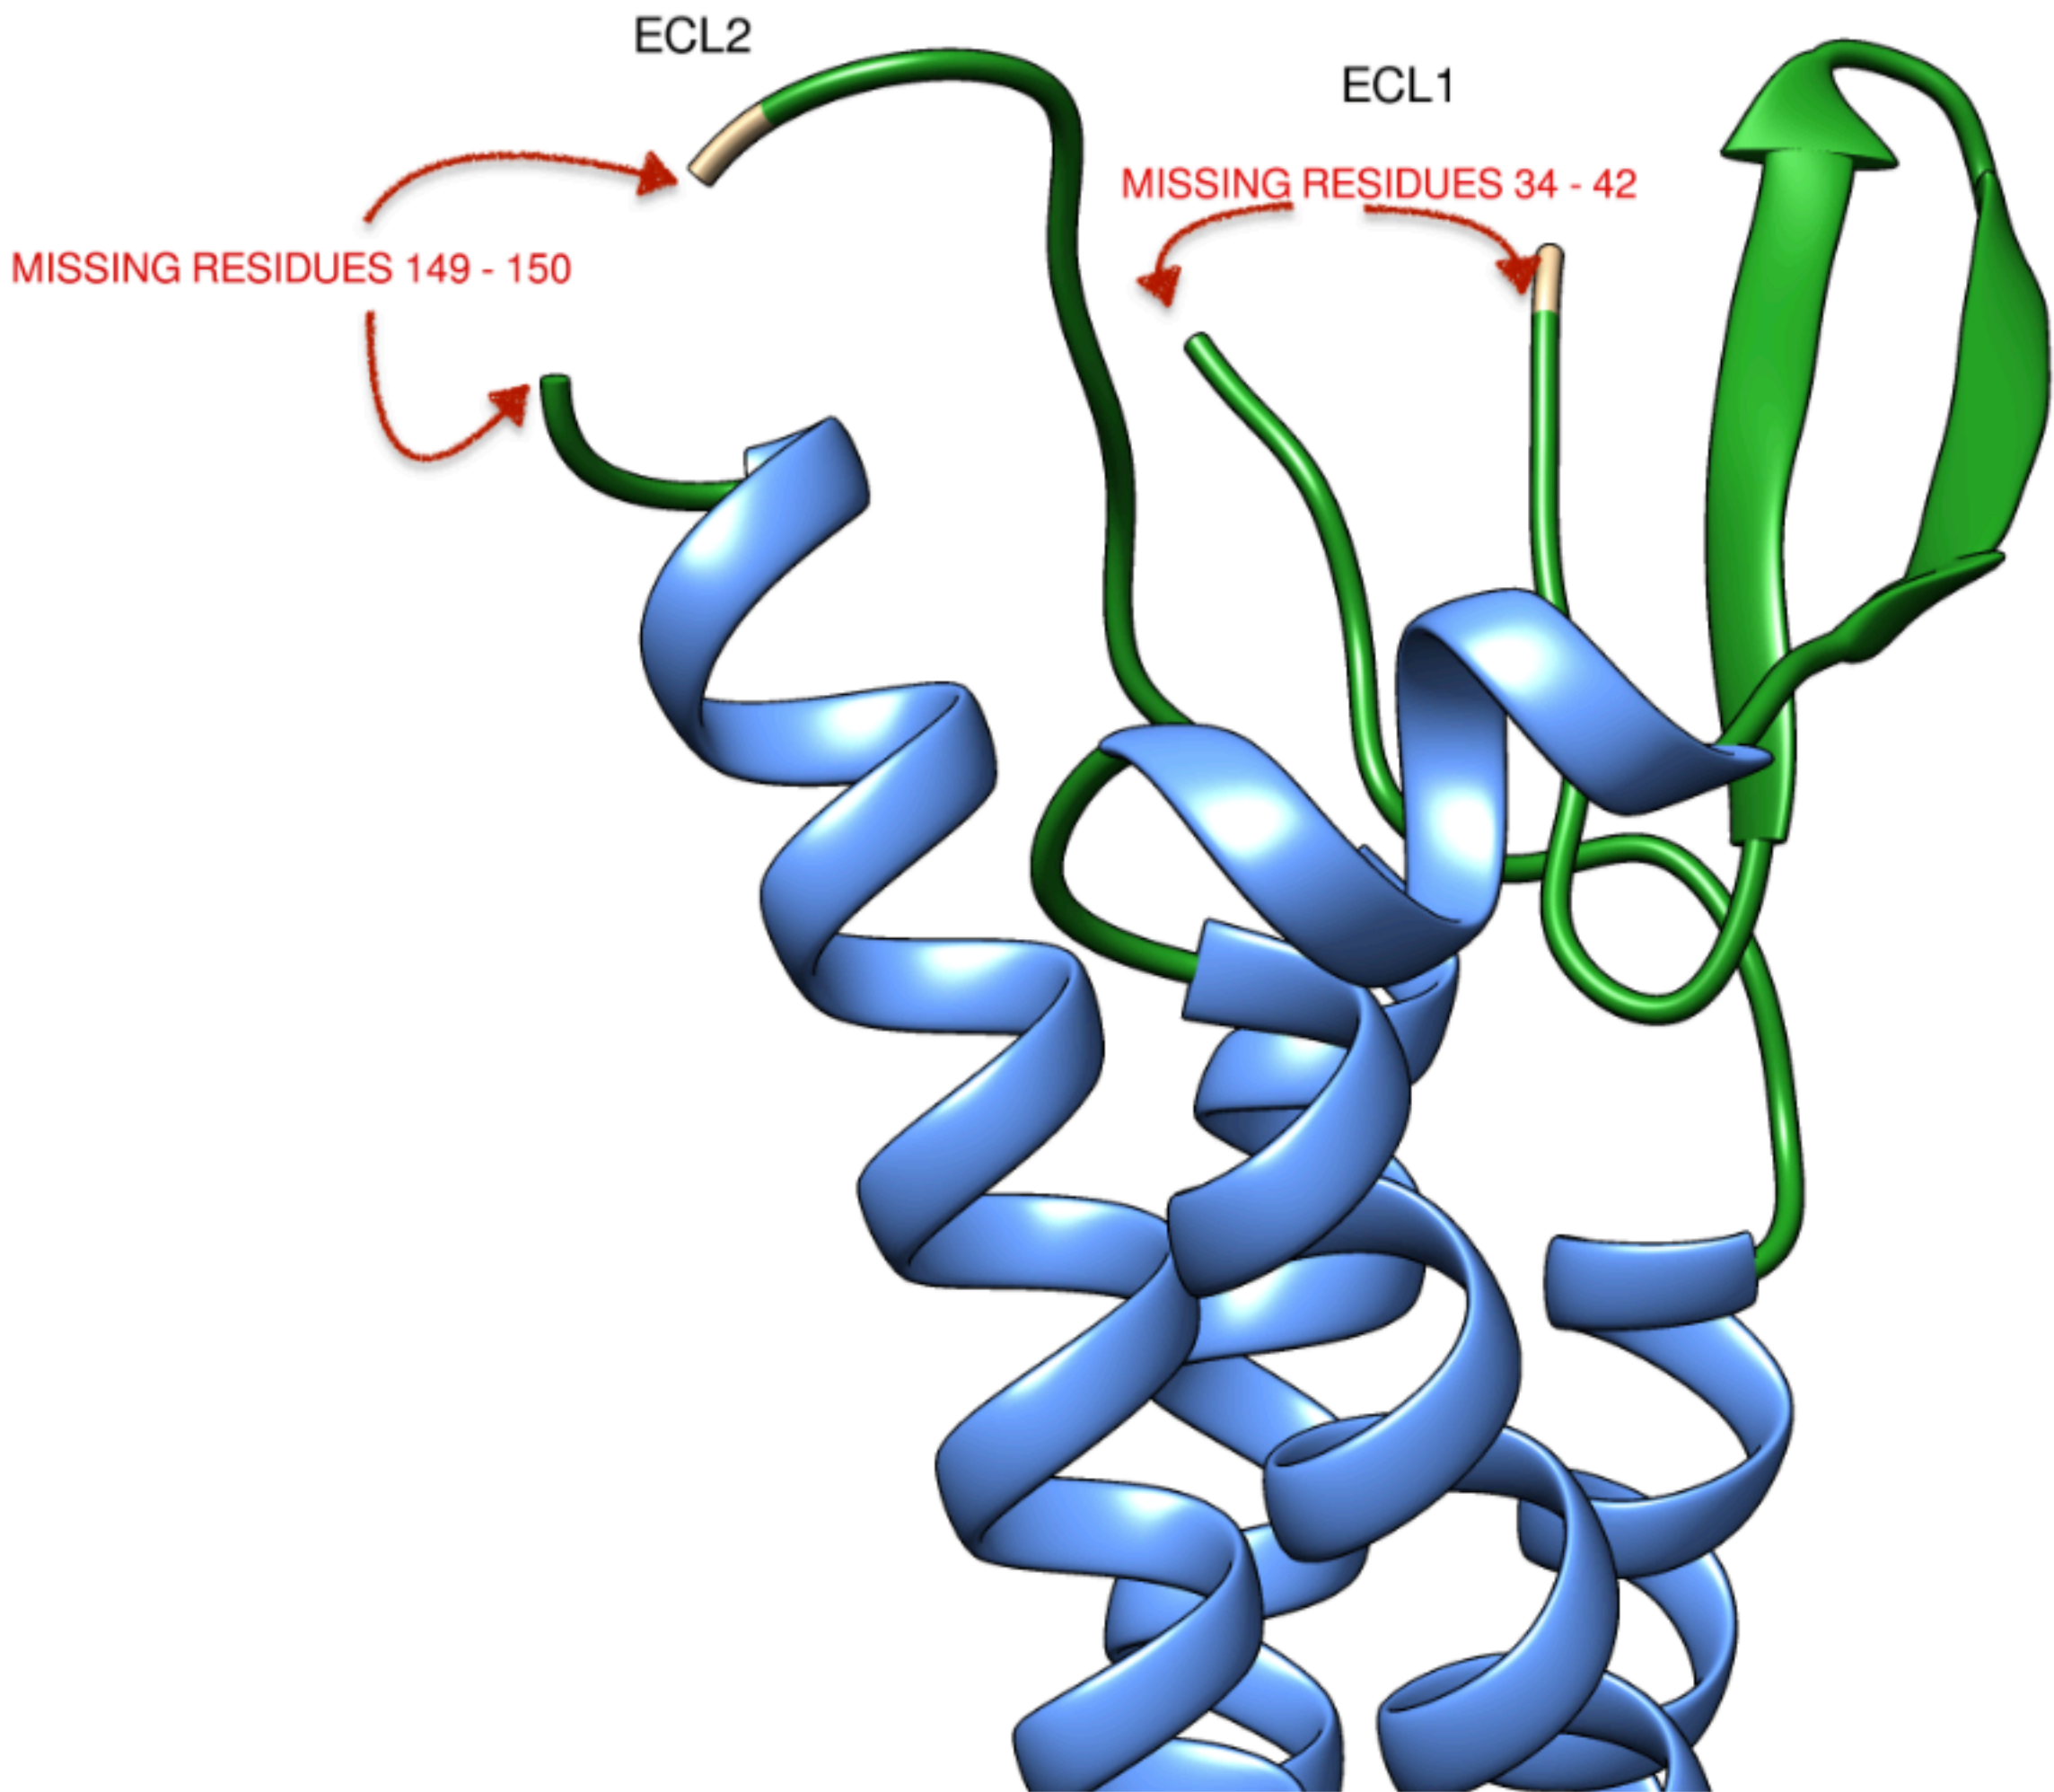

Supplement: pone.0184190.s004.pdf [file pone.0184190.s004.pdf]
